# Supplementary material for: Emergency Psychiatry Experience, Resident Burnout, and Future Plans to Treat Publicly Funded Patients
Source: Atypon-hosted journal article supplement (doi:10.1176/appi.ps.201400234), 2015-04-15

**Table 1: Demographic Characteristics of Survey Participants (N=91)**

| <b>Age</b>                         | <b>N</b> | <b>%</b> |
|------------------------------------|----------|----------|
| 20-25                              | 3        | 3        |
| 26-30                              | 59       | 65       |
| >30                                | 29       | 32       |
| <b>Gender</b>                      |          |          |
| Male                               | 37       | 41       |
| Female                             | 54       | 59       |
| <b>Medical Education</b>           |          |          |
| US Grad                            | 70       | 77       |
| International Medical Graduate     | 21       | 23       |
| <b>Post graduate Training Year</b> |          |          |
| PGY1                               | 21       | 23       |
| PGY2                               | 23       | 25       |
| PGY3                               | 23       | 25       |
| PGY4                               | 20       | 22       |
| PGY 5-6                            | 4        | 4        |
| <b>Children in Household</b>       |          |          |
| Yes                                | 21       | 23       |
| No                                 | 70       | 77       |
| <b>Level of Educational Debt</b>   |          |          |
| ≤\$100K                            | 33       | 37       |
| >\$100K                            | 57       | 63       |
| <b>Race</b>                        |          |          |
| White                              | 59       | 65       |
| Non-White                          | 32       | 35       |

Figure 1: Medicare and Medicaid Acceptance By Burnout Tertile

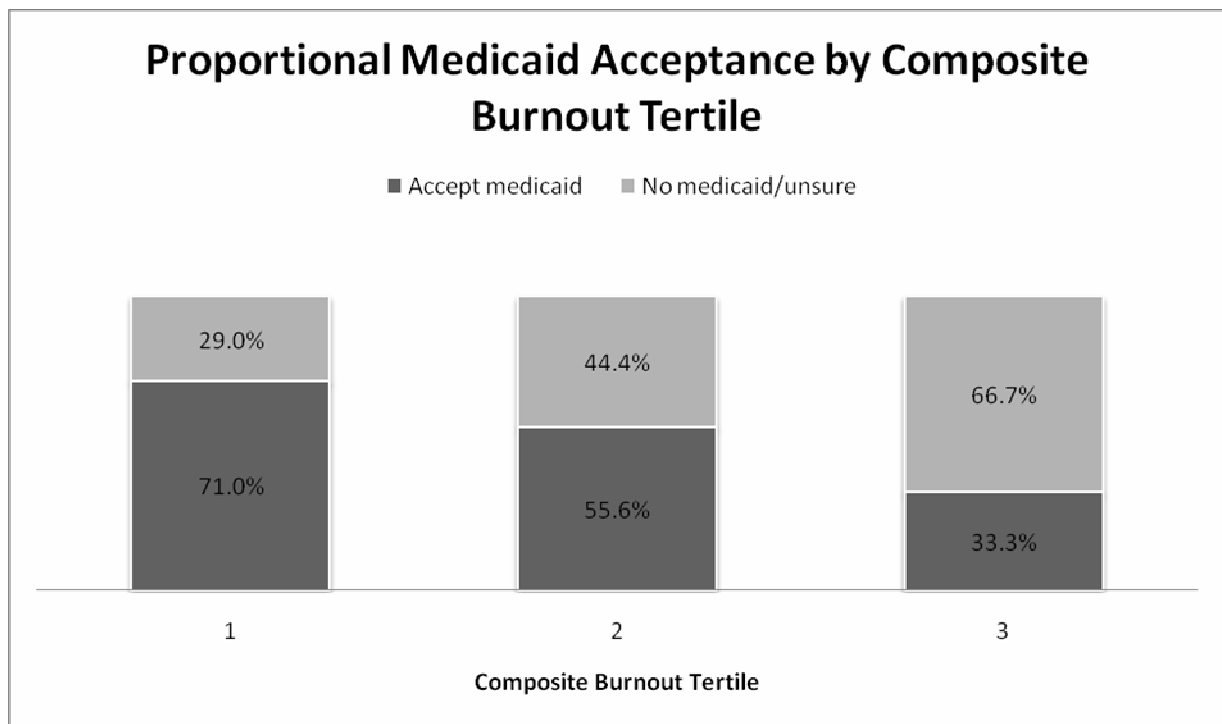

Supplement: appi.ps.201400234.ds001.pdf [file appi.ps.201400234.ds001.pdf]
